# Supplementary material for: Assistive Products and Technology to Facilitate Activities and Participation for Children with Disabilities
Source: MDPI journal article supplement (doi:10.3390/ijerph20032086), 2023-01-23
Supplement: s1 [file s1]

**Table S1.** Study results for the pathologies of the respondents or of the relative(s) of the respondents.

|                                                                                                                | Children and Youth<br>n=92 | Relatives<br>n=493 |
|----------------------------------------------------------------------------------------------------------------|----------------------------|--------------------|
| Certain conditions originating in the perinatal period                                                         | 1 (1.1%)                   | 4 (0.8%)           |
| Infectious and parasitic diseases including:                                                                   | 3 (3.3%)                   | 0 (0%)             |
| - Poliomyelitis                                                                                                | 3 (3.3%)                   |                    |
| Injury:                                                                                                        | 1 (1.1%)                   | 0 (0%)             |
| - Traumatic amputation of leg                                                                                  | 1 (1.1%)                   |                    |
| Traumatic head injuries                                                                                        | 0 (0%)                     | 4 (0.8%)           |
| Diseases of the circulatory system                                                                             | 1 (1.1%)                   | 1 (0.2%)           |
| Diseases of the eye and adnexa                                                                                 | 2 (2.2%)                   | 4 (0.8%)           |
| Diseases of the ear and mastoid process                                                                        | 2 (2.2%)                   | 3 (0.6%)           |
| Diseases of the blood and blood-forming organs and certain disorders involving the immune mechanism including: | 6 (6.5%)                   | 42 (8.5%)          |
| - Di George's syndrome                                                                                         | 4 (4.3%)                   | 42 (8.5%)          |
| Diseases of the nervous system including:                                                                      | 50 (54.3%)                 | 181 (36.7%)        |
| -Spinal muscular atrophy                                                                                       | 4 (4.3%)                   | 13 (2.6%)          |
| -Vascular syndromes of brain                                                                                   |                            | 11 (2.2%)          |
| -Myopathies                                                                                                    | 17 (18.5%)                 | 22 (4.5%)          |
| -Cerebral palsy and other paralytic syndromes                                                                  | 25 (27.2%)                 | 105 (21.3%)        |
| Diseases of the musculoskeletal system and connective tissue                                                   | 2 (2.2%)                   | 1 (0%)             |
| Endocrine, nutritional and metabolic diseases                                                                  | 3 (3.3%)                   | 10 (2.0%)          |
| Congenital malformations, deformations and chromosomal abnormalities including:                                | 9 (9.8%)                   | 128 (25.0%)        |
| -Angelman syndrome                                                                                             |                            | 12 (2.4%)          |
| -Williams syndrome                                                                                             |                            | 13 (2.6%)          |
| -Trisomy                                                                                                       |                            | 17 (3.4%)          |
| Symptoms, signs and abnormal clinical and laboratory findings, not classified elsewhere                        | 0 (0%)                     | 2 (0.4%)           |
| Genetic syndromes                                                                                              | 0 (0%)                     | 1 (0.2%)           |
| Mental and behavioural disorders including:                                                                    | 7 (7.6%)                   | 77 (15.6%)         |
| -Autistic spectrum disorder                                                                                    | 4 (4.3%)                   | 39 (7.9%)          |
| Neoplasms                                                                                                      | 3 (3.3%)                   | 4 (0.8%)           |
| Unclassifiable                                                                                                 | 1 (1.1%)                   | 14 (2.84%)         |
| No response                                                                                                    | 1 (1.1%)                   | 17 (3.4%)          |

**Table S2.** Study results for the type of relationship of the relatives.

|              |             |
|--------------|-------------|
| Mother       | 378 (77.5%) |
| Father       | 64 (13.1%)  |
| Sister       | 9 (1.8%)    |
| Brother      | 5 (1%)      |
| Aunt/Uncle   | 4 (0.8%)    |
| Cousin       | 1 (0.2%)    |
| Grand parent | 17 (3.5%)   |
| Friend       | 3 (0.6%)    |
| Other        | 7 (1.4%)    |

**Table S3.** Study results for the type of professions.

|                                                         |             |
|---------------------------------------------------------|-------------|
| Early childhood professional                            | 3 (0.8%)    |
| Engineer                                                | 2 (0.5%)    |
| Healthcare worker                                       | 29 (7.7%)   |
| Physician                                               | 77 (20.4%)  |
| Recreational worker in an activity centre/sports centre | 4 (1.1%)    |
| Rehabilitation specialist                               | 116 (30.8%) |
| Specialised educator                                    | 25 (6.6%)   |
| Teacher                                                 | 15 (4%)     |
| Other                                                   | 106 (28.1%) |
